# Supplementary material for: Facile fabrication of direct solid-state Z-scheme g-C3N4/Fe2O3 heterojunction: a cost-effective photocatalyst with high efficiency for the degradation of aqueous organic pollutants
Source: Royal Society of Chemistry journal article supplement (doi:10.1039/c8dt02893a), 2018-01-01
Supplement: c8dt02893a1.pdf [file c8dt02893a1.pdf]

**Facile fabrication of direct solid-state Z-scheme g-  
C<sub>3</sub>N<sub>4</sub>/Fe<sub>2</sub>O<sub>3</sub> heterojunction: A cost-effective photocatalyst  
with high efficiency for aqueous organic pollutant  
degradation**

Junwei Wang<sup>1</sup>, Xiaojun Zuo<sup>1</sup>, Wei Cai<sup>1</sup>, Jinwei Sun<sup>1</sup>, Xinlei Ge<sup>1,\*</sup>, Hui Zhao<sup>1,2,\*</sup>

1. Collaborative Innovation Center of Atmospheric Environment and Equipment Technology,  
Jiangsu Key Laboratory of Atmospheric Environment Monitoring and Pollution Control, School  
of Environmental Science and Engineering, Nanjing University of Information Science &  
Technology (NUIST), 219 Ningliu Road, Nanjing 210044, China

2. Jiangsu Key Laboratory of Anaerobic Biotechnology, School of Environment and Civil  
Engineering, Jiangnan University, 1800 Lihu Avenue, Wuxi 214122, China

\* Corresponding authors: Dr. Xinlei Ge: [caxinra@163.com](mailto:caxinra@163.com); Dr. Hui Zhao:  
[zhaohui0919@163.com](mailto:zhaohui0919@163.com).

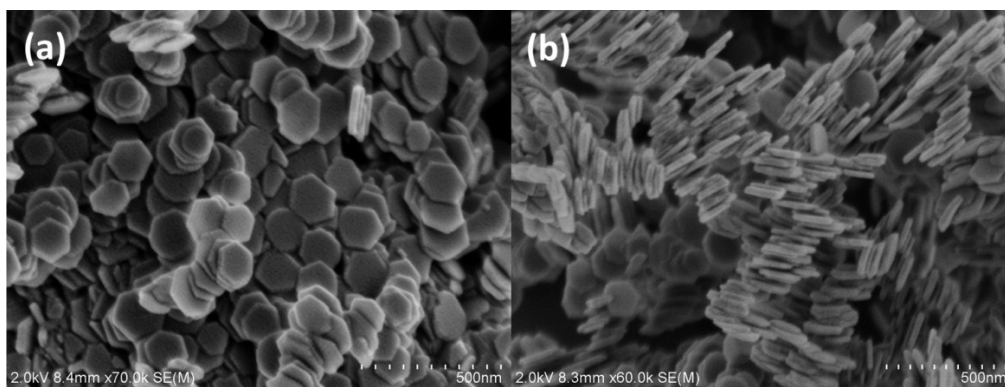

**Fig. S1.** SEM images of  $\alpha$ -Fe<sub>2</sub>O<sub>3</sub> surface (a) and side (b).

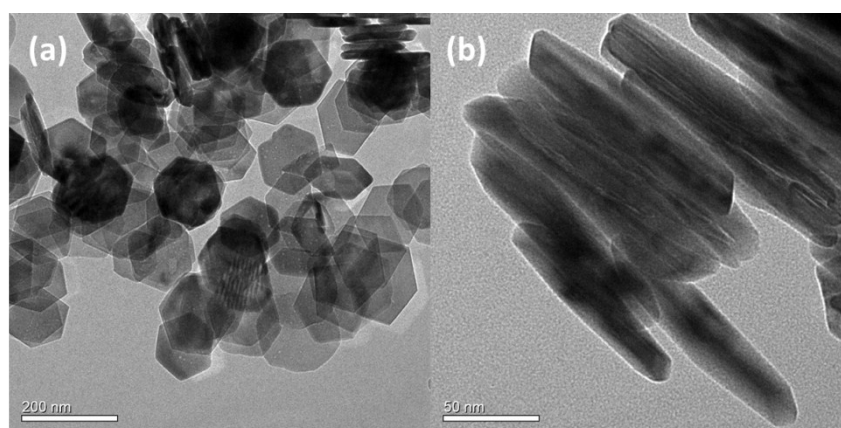

**Fig. S2.** TEM images of  $\alpha$ -Fe<sub>2</sub>O<sub>3</sub> surface (a) and side (b)

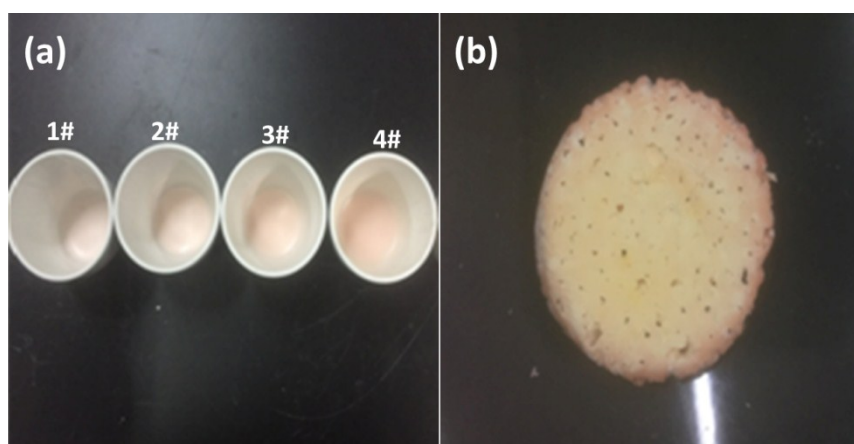

**Fig. S3.** Images of the generated g-C<sub>3</sub>N<sub>4</sub>/Fe<sub>2</sub>O<sub>3</sub> composites in the crucibles (a) and typical g-C<sub>3</sub>N<sub>4</sub>/Fe<sub>2</sub>O<sub>3</sub>-2# agglomeration picked out from the crucible.

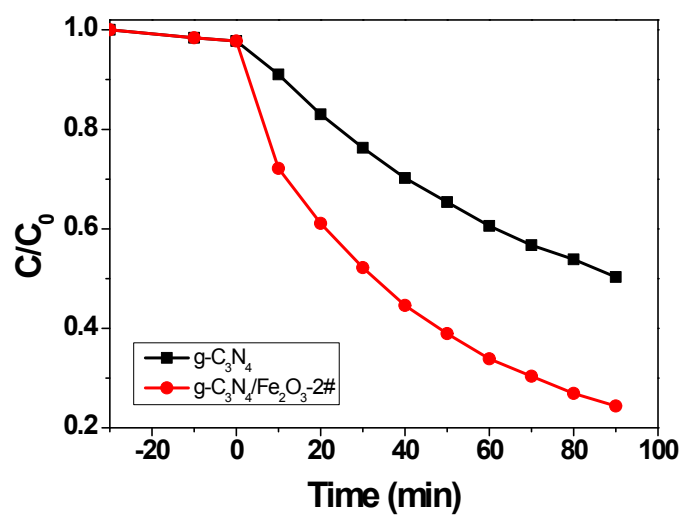

**Fig. S4** Visible-light-driven TC degradation of TC in presence of  $g-C_3N_4$  and  $g-C_3N_4/Fe_2O_3-2\#$ .  
Experimental conditions: reaction volume: 100 mL, TC concentration: 10 mg/L, catalyst concentration: 0.3 mg/mL.
